# Supplementary material for: Biooxidation of Ciguatoxins Leads to Species-Specific Toxin Profiles
Source: MDPI journal article supplement (doi:10.3390/toxins9070205), 2017-06-29
Supplement: s1 [file s1]

# Supplementary Materials: Biooxidation of Ciguatoxins Leads to Species-Specific Toxin Profiles

Tsuyoshi Ikehara, Kyoko Kuniyoshi, Naomasa Oshiro and Takeshi Yasumoto

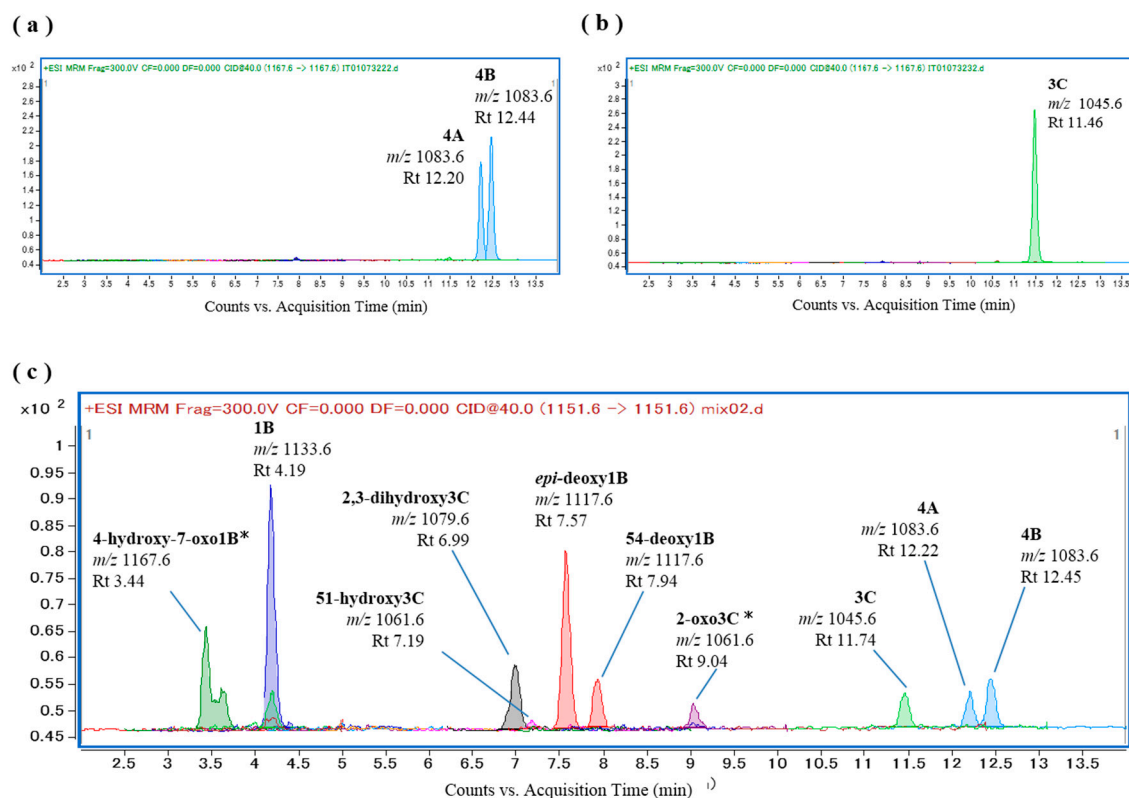

**Figure S1.** Chromatograms, retention times (Rts), and  $m/z$  values for the ciguatoxins (CTXs) that were used as substrates for *in vitro* oxidation. (a) CTX4A/4B; (b) CTX3C; and (c) reference toxins for liquid chromatography-tandem mass spectrometry (LC-MS/MS) analysis. 4A: CTX4A; 4B: CTX4B; 3C: CTX3C; 4-hydroxy-7-oxo-1B: 4-hydroxy-7-oxo-CTX1B; 1B: CTX1B; 2,3-dihydroxy3C: 2,3-dihydroxyCTX3C; 51-hydroxy3C: 51-hydroxyCTX3C; epi-deoxy1B: 52-epi-54-deoxyCTX1B; deoxy1B: 54-deoxyCTX1B; 2-oxo3C: 2-oxo-CTX3C.

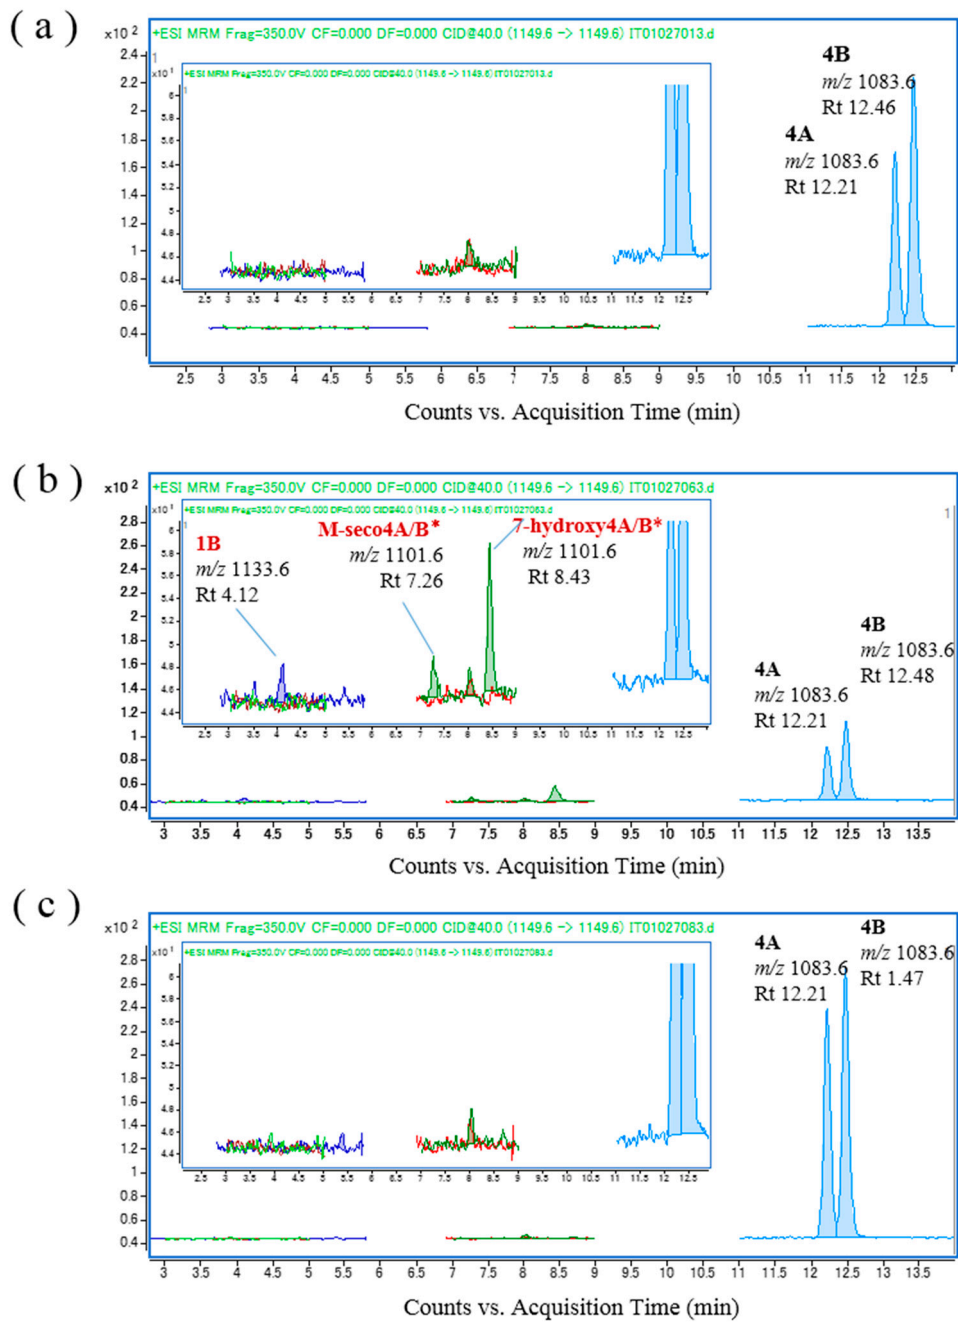

**Figure S2.** Chromatograms of the *in vitro* oxidation products of ciguatoxin-4A/4B (CTX4A/4B) following incubation with recombinant human CYP3A4 (rhCYP3A4). Products are shown (a) at 0 min, (b) at 60 min, and (c) at 60 min without rhCYP3A4. The inset in each panel shows a magnified view of the chromatogram. 4A: CTX4A; 4B: CTX4B; 1B: CTX1B; M-seco4A/4B: M-secoCTX4A/4B; 7-hydroxy4A/4B: 7-hydroxyCTX4A/4B.

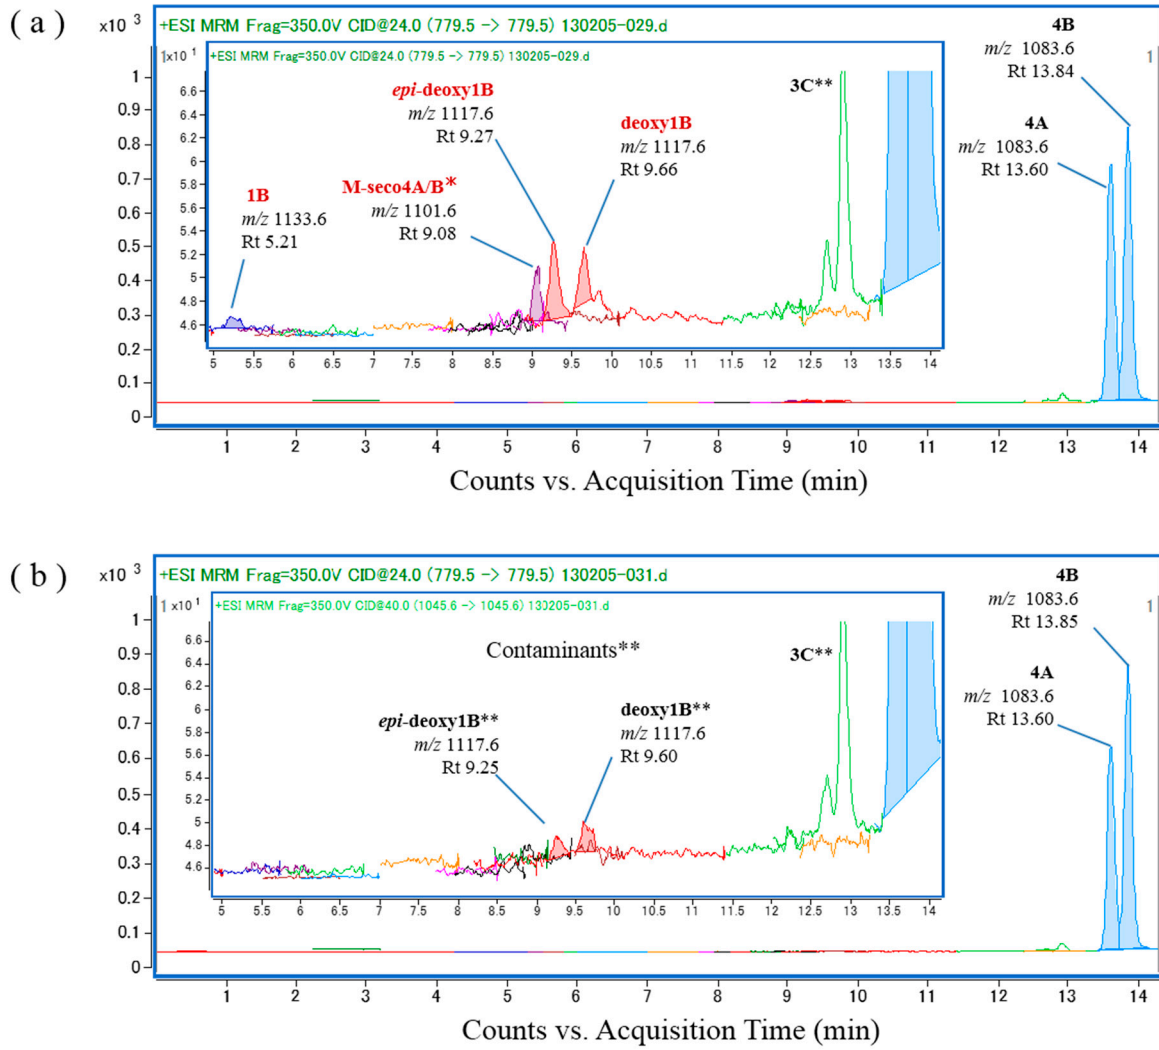

**Figure S3.** Chromatograms of the *in vitro* oxidation products of ciguatoxin-4A/4B (CTX4A/4B) following incubation with human liver microsomes. (a) Untreated microsomes and (b) heat-treated microsomes at 90 °C for 5 min. The inset in each panel shows a magnified view of the chromatogram. \*\* The 4A/4B substrate contained trace amounts of CTX3C, epi-deoxy1B, and deoxy1B ( $m/z$  1117). 1B: CTX1B; M-seco4A/4B: M-secoCTX4A/4B; epi-deoxy1B: 52-epi-54-deoxyCTX1B; deoxy1B: 54-deoxyCTX1B; 3C: CTX3C; 4A: CTX4A; 4B: CTX4B.

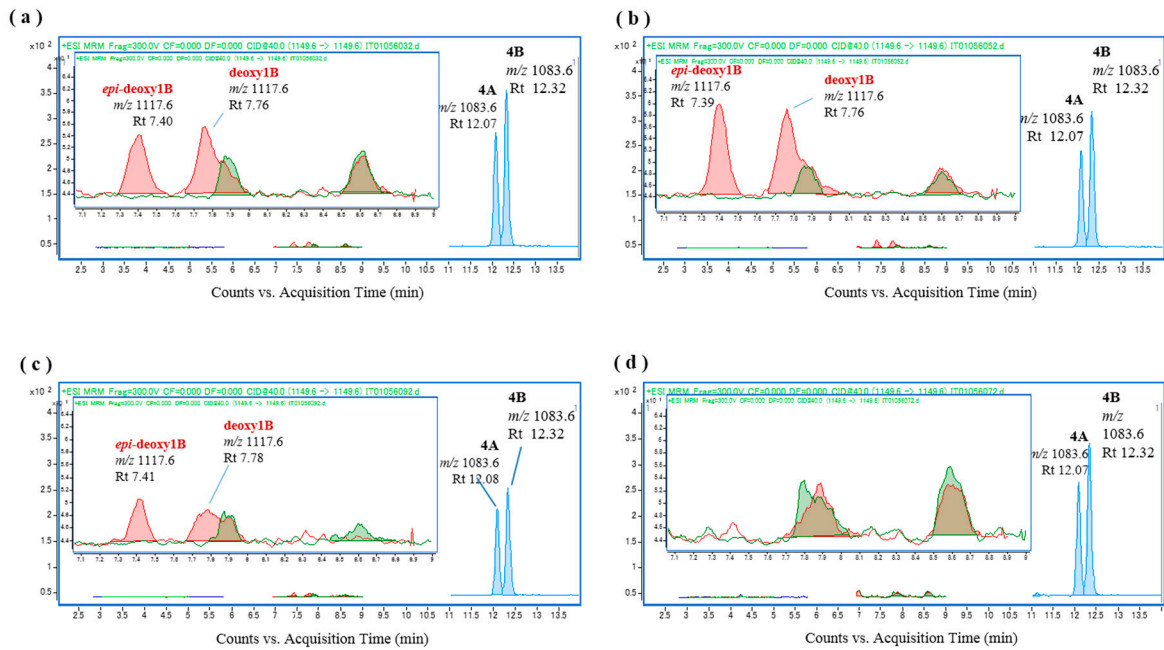

**Figure S4.** Chromatograms of the *in vitro* oxidation products of ciguatoxin-4A/4B (CTX4A/4B) following incubation with the S9 fractions from four different *Lutjanus bohar* specimens. (a) Specimen of 1.5 kg body weight (BW) and 45 cm total length (TL); (b) specimen of 1.1 kg BW and 42 cm TL; (c) specimen of 3.8 kg BW and 62 cm TL; and (d) specimen of 0.5 kg BW and 41 cm TL. The inset in each panel shows a magnified view of the chromatogram. epi-deoxy1B: 52-epi-54-deoxyCTX1B; deoxy1B: 54-deoxyCTX1B; 4A: CTX4A; 4B: CTX4B.

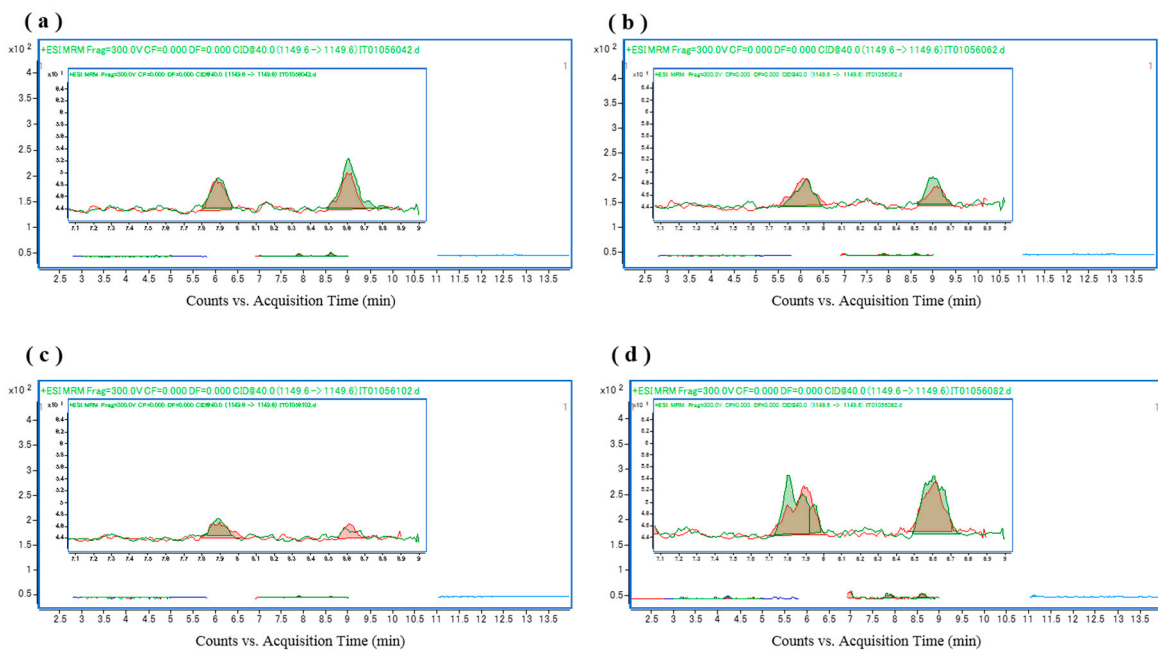

**Figure S5.** Chromatograms of the S9 fractions of four different *Lutjanus bohar* specimens. (a) Specimen of 1.5 kg body weight (BW) and 45 cm total length (TL); (b) specimen of 1.1 kg BW and 42 cm TL; (c) specimen of 3.8 kg BW and 62 cm TL; and (d) specimen of 0.5 kg BW and 41 cm TL. The inset in each panel shows a magnified view of the chromatogram.

**Table S1.** Body size of fish samples used in this study

| Sample No. | Species                      | Sample size        |                  |
|------------|------------------------------|--------------------|------------------|
|            |                              | Body weight ( kg ) | Body length (cm) |
| 1          |                              | 3.80               | 63.0             |
| 2          |                              | 1.50               | 45.0             |
| 3          | <i>Lutjanus bohar</i>        | 1.10               | 42.0             |
| 4          |                              | 3.80               | 62.0             |
| 5          |                              | 0.50               | 31.0             |
| 6          | <i>Lutjanus monostigma</i>   | 0.50               | 30.0             |
| 7          |                              | 1.70               | 47.0             |
| 8          | <i>Oplegnathus punctatus</i> | 1.10               | 30.0             |
| 9          |                              | 2.00               | 50.0             |
| 10         |                              | 0.88               | 37.0             |
| 11         |                              | 0.82               | 38.0             |
| 12         | <i>Lutjanus gibbus</i>       | 0.72               | 36.0             |
| 13         |                              | 0.86               | 38.5             |
| 14         |                              | 0.84               | 38.0             |
| 15         |                              | 0.42               | 29.0             |
| 16         | <i>Lutjanus fulviflamma</i>  | 0.36               | 27.5             |
| 17         |                              | 0.37               | 26.0             |
| 18         |                              | 0.42               | 28.0             |
